# Supplementary material
Source: PubMed Central journal article supplement (PMC3277217)
Supplement: mt2011288x1.pdf [file mt2011288x1.pdf]

Supplementary Table S1: RCR results from packaging cell lines and viral supernatant lots

| Packaging Line | Vector        | Transgene                | Packaging Line | Viral Supernatant |
|----------------|---------------|--------------------------|----------------|-------------------|
| PA317          | G1Na          | Neo                      | 0/1            | 0/1               |
| PG13           | SFG           | CAR-GD2.ζ                | 0/1            | 0/2               |
| PG13           | SFG           | CAR-CD19.CD28.ζ          | 0/1            | 0/2               |
| PG13           | SFG           | CAR-CD19.ζ               | 0/1            | 0/2               |
| PG13           | SFG           | CAR-HER2.CD28.ζ          | 0/1            | 0/2               |
| PG13           | SFG           | CAR-Kappa.ζ              | 0/1            | 0/2               |
| PG13           | SFG           | CAR-CD30.ζ               | 0/1            | 0/2               |
| PG13           | SFG           | CCR4.CAR-CD30.ζ          | 0/1            | 0/2               |
| PG13           | SFG           | TGFβRIIdcyt(DNR1I)       | 0/1            | 0/2               |
| PG13           | SFG           | iCaspase9.ΔCD19          | 0/1            | 0/2               |
| PG13           | LN            | Neo                      | 0/1            | 0/1               |
| PG13           | LXSN          | TNF-α                    | 0/1            | 0/1               |
| PG13           | SFG           | CAR-FBP.Fc               | 0/1            | 0/1               |
| PG13           | MSGV1         | TCR-p53                  | 0/1            | 0/1               |
| PG13           | GCIRES        | IL-2                     | 0/1            | 0/1               |
| PG13           | MSGV1         | TCR-MART-1(DMF4)         | 0/1            | 0/1               |
| PG13           | MSGV1         | TCR-gp100-154            | 0/1            | 0/1               |
| PG13           | MSGV1         | TCR-gp100-209            | 0/1            | 0/1               |
| PG13           | MSGV1         | TCR-MART-1(DMF5m)        | 0/1            | 0/1               |
| PG13           | MSGV1         | CAR-CD19.CD28.ζ          | 0/1            | 0/1               |
| PG13           | MSGV1         | TCR-2G1                  | 0/1            | 0/1               |
| PG13           | MSGV1         | CAR-ERBB2.CD28.41BB.ζ    | 0/1            | 0/1               |
| PG13           | MSGV1         | TCR-CEA                  | 0/1            | 0/1               |
| PG13           | MSGV1         | TCR-NY-ESO-1             | 0/1            | 0/1               |
| PG13           | MSGV1         | CAR-KDR.CD28.41BB.ζ      | 0/1            | 0/1               |
| PG13           | MSGV1         | TCR-MAGE-A3/A12          | 0/1            | 0/1               |
| PG13           | MSGV1         | IL-12                    | 0/1            | 0/1               |
| PG13           | MSGV1         | TCR-MART-1(DMF5)         | 0/1            | 0/2               |
| PG13           | MSGV1         | CAR-EGFRvIII.CD28.41BB.ζ | 0/1            | 0/1               |
| PA317          | rkat4.2SVGF3e | CAR-CD4-ζ                | 0/1            | 0/3               |
| <b>Total</b>   |               |                          | <b>0/30</b>    | <b>0/42</b>       |
