# Supplementary material
Source: PubMed Central journal article supplement (PMC3277217)
Supplement: mt2011288x2.pdf [file mt2011288x2.pdf]

**Supplementary Table S2: Cost analysis of RCR testing**

| <b>Sample</b>      | <b>Assay</b>                             | <b>Cost / test</b> | <b>No. of Tests</b> | <b>Total Cost</b>                |
|--------------------|------------------------------------------|--------------------|---------------------|----------------------------------|
|                    | S+L- Focus Assay (Cells)                 | \$9,913 – 10,200   | 30                  | \$297,390 - \$306,000            |
| MCB                | S+L- Focus Assay (EOP Supernatant)       | \$9,900 - \$9,913  | 30                  | \$297,000 - \$297,390            |
|                    | RT Detection<br>XC Plaque Assay          | \$2,350 - \$4,853  | 30                  | \$70,500 - \$145,590             |
| Vector Supernatant | S+L- Focus Assay<br>(Vector Supernatant) | \$9,900 - \$9,913  | 42                  | \$415,800 - \$416,346            |
|                    | S+L- Focus Assay<br>(EOP Cells)          | \$9,913 - \$10,200 | 42                  | \$416,346 - \$428,400            |
| T Cell Product     | S+L- Focus Assay                         | \$9,900 - \$9,913  | 312                 | \$3,088,800 - \$3,092,856        |
| Patient Monitoring | PCR                                      | \$500              | 629                 | \$314,500                        |
| <b>Grand Total</b> |                                          |                    |                     | <b>\$4,900,336 - \$5,001,082</b> |
